# Supplementary material for: Comparative Effectiveness of Primary Prevention Implantable Cardioverter‐Defibrillators in Older Heart Failure Patients With Diabetes Mellitus
Source: PubMed Central journal article supplement — J Am Heart Assoc. 2020 May 30;9(12):e012405. doi: 10.1161/JAHA.119.012405 (PMC7429066; doi:10.1161/jaha.119.012405), 2020-05-30

# **SUPPLEMENTAL MATERIAL**

**Table S1. Percentage missing data of the adjustment variables and the imputation method utilized.**

| <b>Label</b>                                                       | <b>Missing</b> | <b>Imputation</b>                                                              |
|--------------------------------------------------------------------|----------------|--------------------------------------------------------------------------------|
| Demographics: Age (18-110)                                         | 0.0%           |                                                                                |
| Black / African-Americans*                                         | 0.0%           | A binary indicator variable was used for race/ethnicity=Black/African-American |
| Ischemic history                                                   | 0.0%           |                                                                                |
| Hypertension                                                       | 0.0%           |                                                                                |
| Atrial fibrillation or flutter                                     | 0.0%           |                                                                                |
| COPD                                                               | 0.0%           |                                                                                |
| Renal insufficiency                                                | 0.0%           |                                                                                |
| CVA/TIA                                                            | 0.0%           |                                                                                |
| anemia                                                             | 0.0%           |                                                                                |
| Heart failure history                                              | 0.0%           |                                                                                |
| diuretics                                                          | 25.8%          | Multiple imputation                                                            |
| statin                                                             | 23.7%          | Multiple imputation                                                            |
| beta blockers                                                      | 8.1%           | Multiple imputation                                                            |
| digoxin                                                            | 0.0%           |                                                                                |
| ACEI/ARB                                                           | 23.0%          | Multiple imputation                                                            |
| Ca channel blocker                                                 | 0.0%           |                                                                                |
| Ejection Fraction, %                                               | 0.0%           |                                                                                |
| SBP (50-250), mmHg                                                 | 15.1%          | Multiple imputation                                                            |
| BUN                                                                | 37.2%          | Multiple imputation                                                            |
| Sodium                                                             | 37.3%          | Multiple imputation                                                            |
| Hospital region                                                    | 0.0%           |                                                                                |
| Teaching hospitals                                                 | 0.3%           | Not imputed                                                                    |
| Number of beds in hospital                                         | 0.1%           | Not imputed                                                                    |
| Site ability to perform PCI, cardiac surgery, or heart transplants | 5.1%           | Multiple imputation                                                            |

\*An indicator variable was used for Black/African-Americans. That is, any patient belonging to a different race/ethnic group, including “other” or “missing” were set to “No” (not black/African-American).

**Figure S1. Risk of all-cause mortality associated with ICD implantation among patients with diabetes aged 65-74 years.**

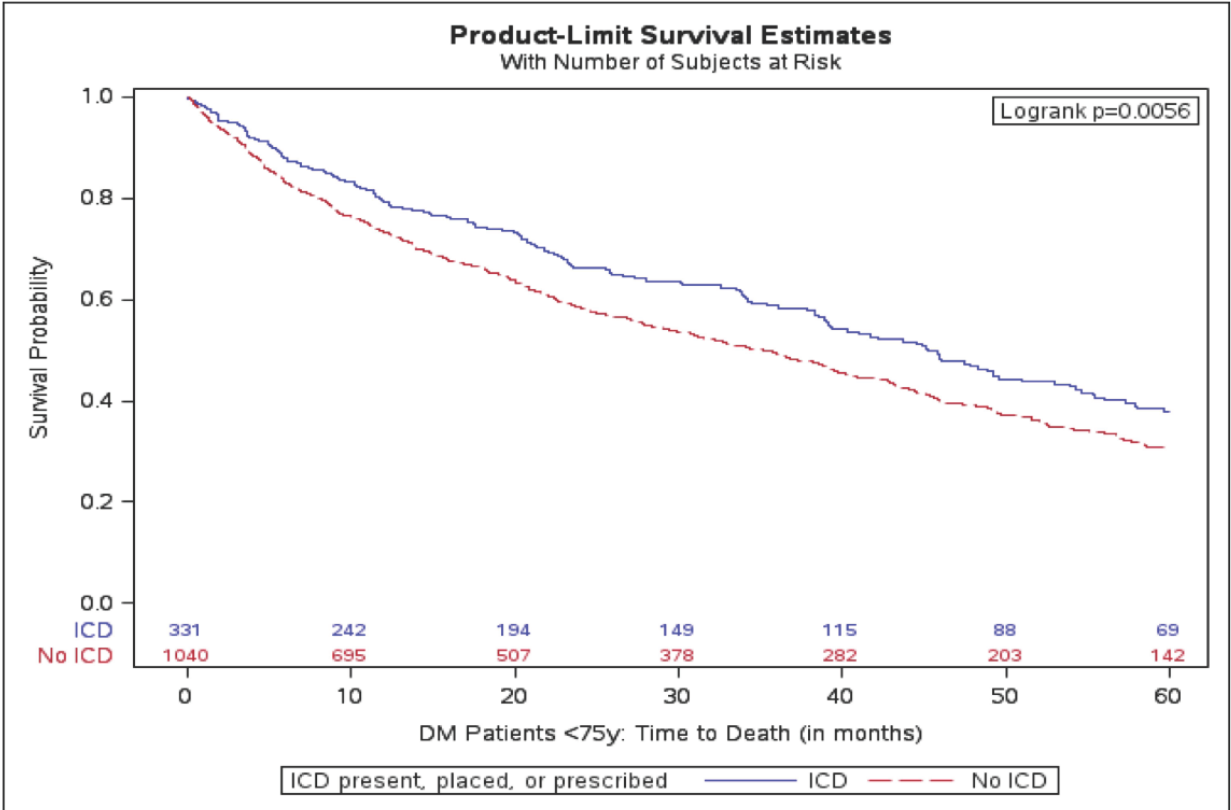

**Figure S2. Risk of all-cause mortality associated with ICD implantation among patients with diabetes aged 75 years of greater.**

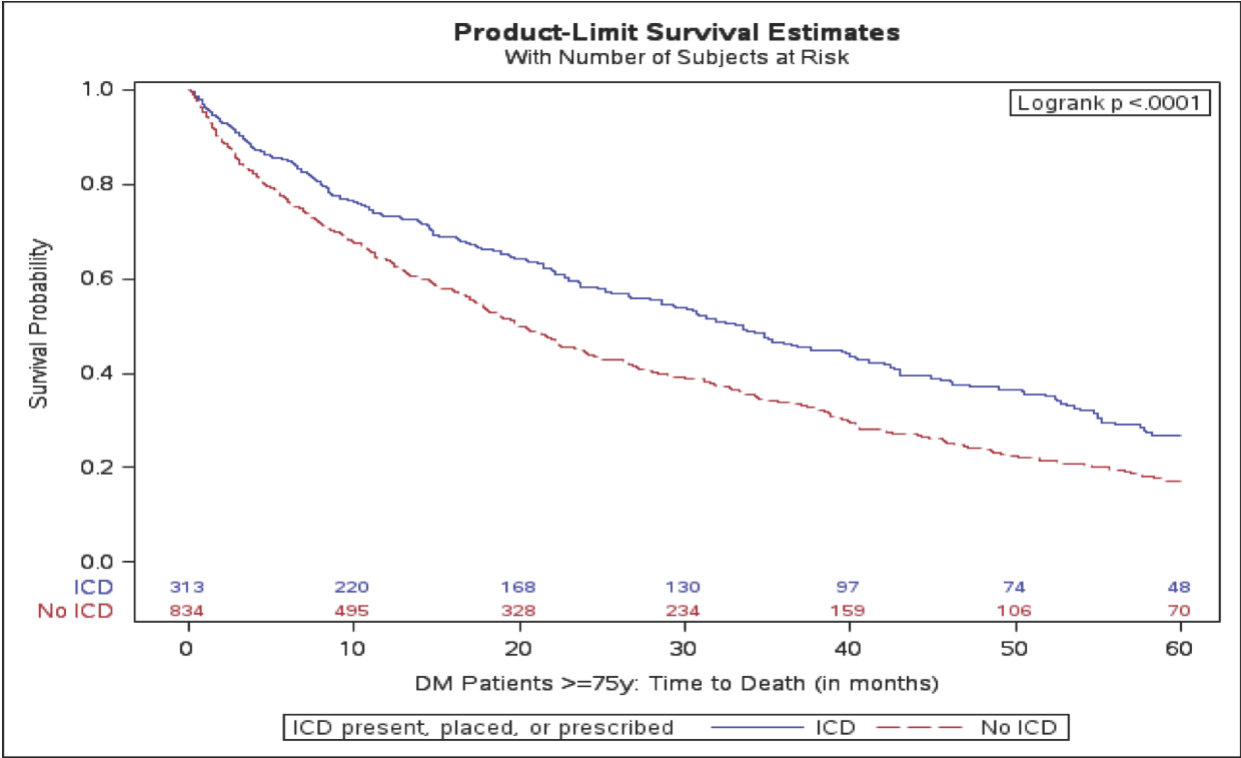

**Figure S3. Risk of all-cause mortality associated with ICD implantation among patients without diabetes aged 65-74 years.**

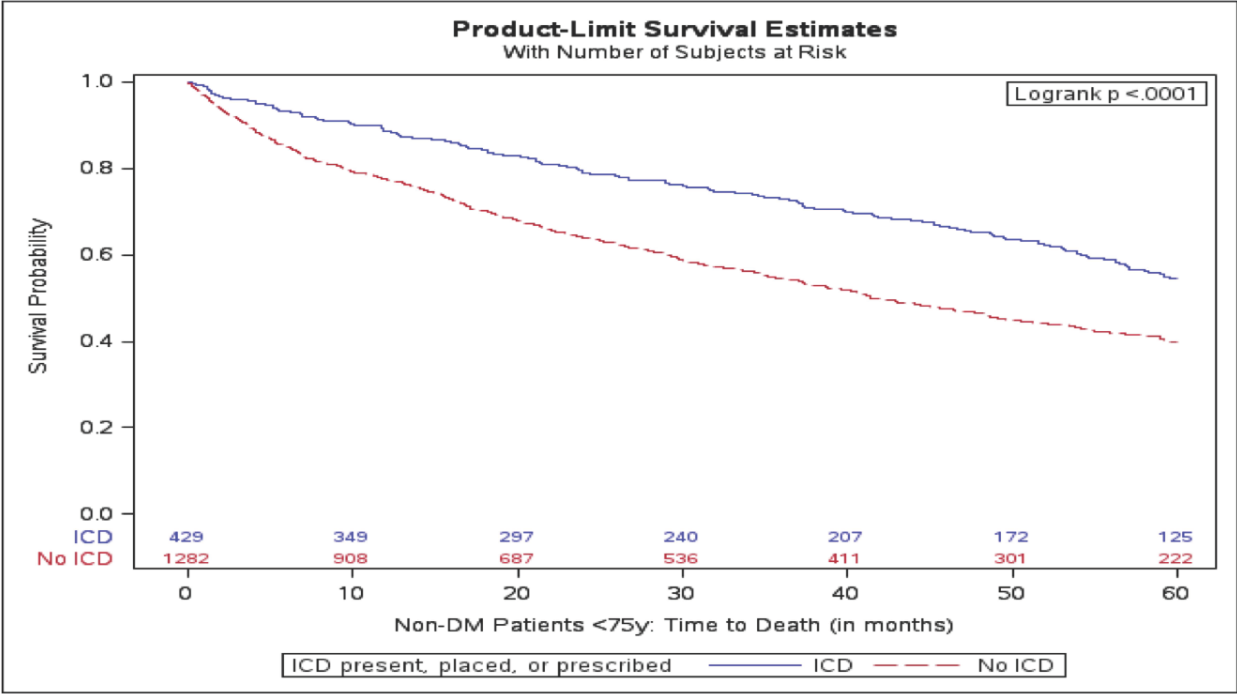

**Figure S4. Risk of all-cause mortality associated with ICD implantation among patients with diabetes aged 75 years of greater.**

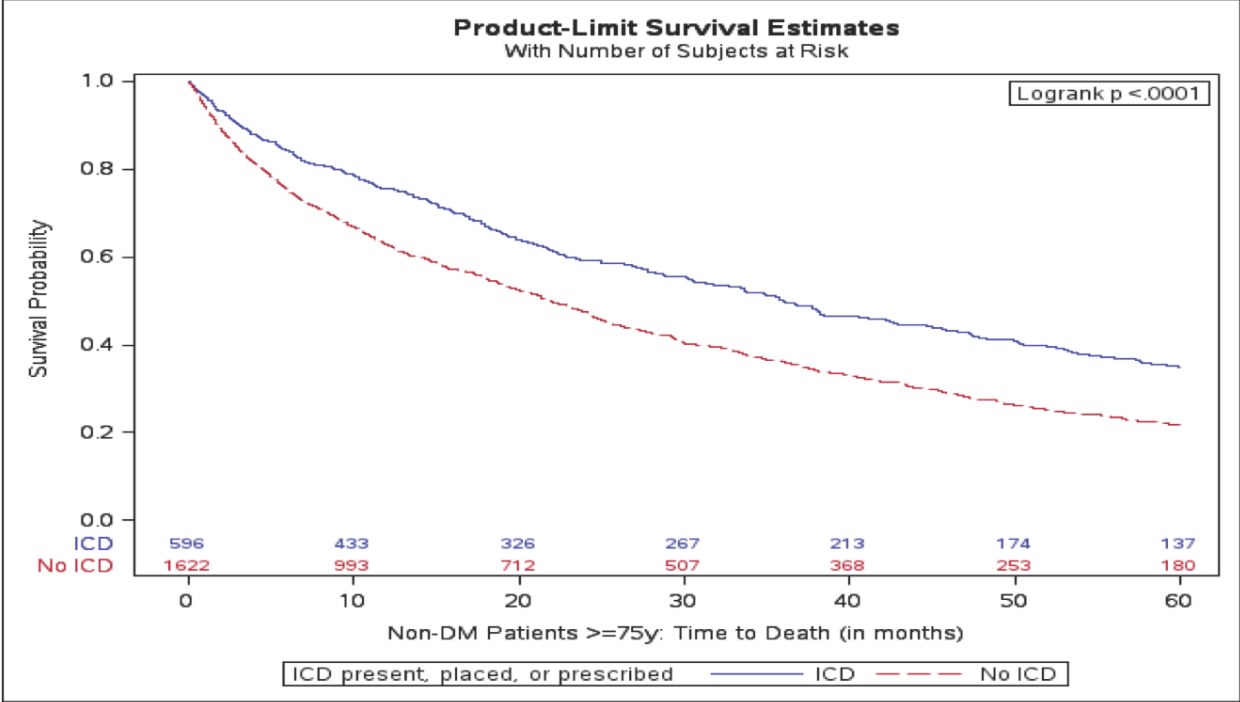

Supplement: JAH3-9-e012405-s001.pdf [file JAH3-9-e012405-s001.pdf]
